# Supplementary material
Source: Springer Nature journal article supplement (https://www.springermedizin.de/resource/supplementary/12978_2007_31_MOESM4_ESM.pdf/9602708)

# Funnel Plot of Precision by MH log risk ratio

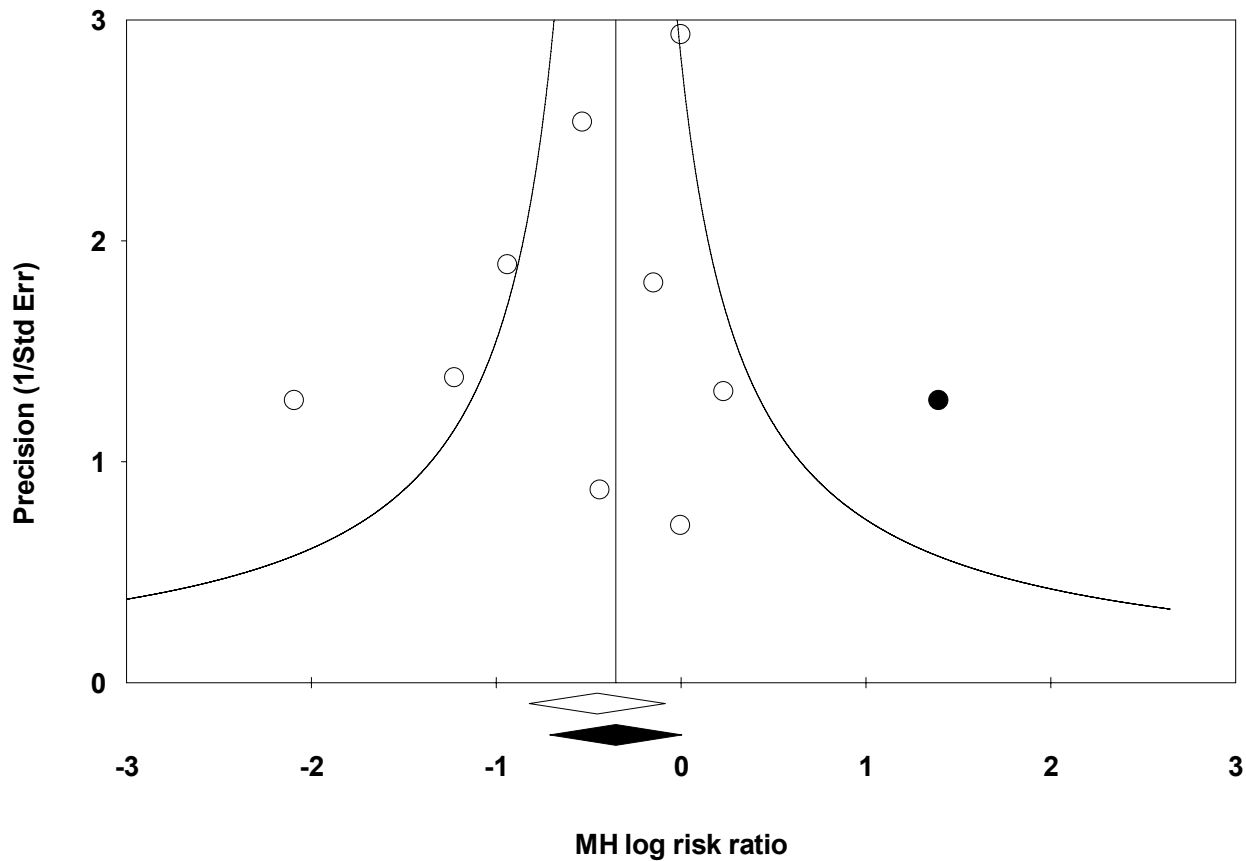

Supplement: MOESM4 [file 9602708]
